# Supplementary material
Source: PubMed Central journal article supplement (PMC3512157)
Supplement: 2af567ebef139adc28a3634fed71fdd4_genetics.112.145573-10.pdf [file 2af567ebef139adc28a3634fed71fdd4_genetics.112.145573-10.pdf]

**Table S2 Deletions leading to an Ahs- phenotype only in Sigma.**

|           |           |           |           |
|-----------|-----------|-----------|-----------|
| YKR024C   | YGR162W   | YPL031C   | YIR021W   |
| YHR114W   | YAL048C   | YDL044C   | YER161C   |
| YML022W   | YPL259C   | YBR191W   | YGR123C   |
| YLR278C   | YLR370C   | YGR105W   | YDL069C   |
| YGL258W   | YNL271C   | YKL119C   | YDR197W   |
| YGR271C-A | YMR267W   | YOR085W   | YML024W   |
| YML117W   | YDR079W   | YNR051C   | YBR165W   |
| YOR267C   | YDR529C   | YEL059C-A | YER154W   |
| YMR044W   | YPL132W   | YPL086C   | YLR384C   |
| YOR213C   | YLR204W   | YPL024W   | YDR074W   |
| YMR127C   | YLR315W   | YILO08W   | YHL034C   |
| YCR009C   | YER156C   | YFR019W   | YDR096W   |
| YCR088W   | YLR375W   | YPL193W   | YDL081C   |
| YILO34C   | YFR048W   | YJL124C   | YOL023W   |
| YMR008C   | YGL188C-A | YPR040W   | YIL125W   |
| YGR040W   | YGL211W   | YDR512C   | YDR120C   |
| YGL014W   | YGL228W   | YNL098C   | YGR020C   |
| YDR005C   | YKL037W   | YOL051W   | YOR332W   |
| YNL053W   | YOR141C   | YDR289C   | YFL054C   |
| YOR002W   | YKL110C   | YGR257C   | YGR272C   |
| YOR067C   | YDR276C   | YLL041C   | YBR026C   |
| YDL159W   | YBL007C   | YNL037C   | YHR011W   |
| YGL019W   | YBR245C   | YOR136W   | YCR105W   |
| YGR188C   | YGR062C   | YEL051W   | YPR116W   |
| YLR362W   | YLR337C   | YKL080W   | YCR079W   |
| YHR021C   | YLR056W   | YDL067C   | YER014C-A |
| YPR043W   | YGR014W   | YLR295C   | YLR390W-A |
| YBR189W   | YGR037C   | YBL099W   | YGR229C   |
| YGR232W   | YHL038C   | YDR298C   | YDR359C   |
| YER118C   | YGL252C   | YBL066C   | YLR385C   |
| YMR312W   | YAL002W   | YBR162C   | YOL068C   |
| YPL101W   | YOR334W   | YLR404W   | YMR263W   |
| YKL143W   | YOL115W   | YNL097C   | YCR077C   |
| YDR184C   | YGL003C   | YGR180C   | YHR120W   |
| YDL190C   | YPL005W   | YCR086W   | YER061C   |
| YEL060C   | YDR140W   | YDR129C   | YHR067W   |
| YDL005C   | YAL023C   | YML008C   | YBL071W-A |
| YGL025C   | YDR477W   | YGL084C   | YER014W   |

|         |
|---------|
| YEL065W |
| YOR198C |
| YPL055C |
| YDR393W |
| YHL020C |
| YGL246C |
| YER117W |
| YDL191W |
| YGL129C |
| YMR158W |
| YPL104W |
| YPR166C |
| YDR175C |
| YPL040C |
| YPL118W |
| YLR192C |
| YJL180C |
| YER017C |
| YMR089C |
| YNL121C |
| YPL148C |
| YILO49W |
| YNL119W |
| YHR084W |
| YHR111W |
| YIR019C |
| YFL026W |
| YNL180C |
| YDR194C |
| YKL149C |
| YKL194C |
| YPR163C |
| YBR127C |
| YMR293C |
| YKL055C |
| YOR221C |
| YPL271W |
| YDR332W |
| YOR305W |

|           |
|-----------|
| YBR163W   |
| YER087W   |
| YGL107C   |
| YGR102C   |
| YMR066W   |
| YMR098C   |
| YOR205C   |
| YLR443W   |
| YILO84C   |
| YOR330C   |
| YLR382C   |
| YKL134C   |
| YNL073W   |
| YGR171C   |
| YCR028C-A |
| YDR296W   |
| YOL095C   |
| YGL219C   |
| YNL213C   |
| YGR101W   |
| YLL006W   |
| YOL009C   |
| YOR211C   |
| YML062C   |
| YLR435W   |
| YDL090C   |
| YBR146W   |
| YBL038W   |
| YBR251W   |
| YBR268W   |
| YBR282W   |
| YCR003W   |
| YCR024C   |
| YCR046C   |
| YCR071C   |
| YDL045W-A |
| YDR237W   |
| YDR322W   |
| YDR347W   |

|           |
|-----------|
| YDR405W   |
| YER050C   |
| YGR215W   |
| YHR147C   |
| YHR168W   |
| YILO93C   |
| YKL003C   |
| YKL138C   |
| YKL155C   |
| YKL170W   |
| YKR006C   |
| YLR312W-A |
| YLR439W   |
| YMR024W   |
| YMR193W   |
| YNL005C   |
| YNL081C   |
| YNL252C   |
| YPL173W   |
| YPR047W   |
| YBL090W   |
| YDR115W   |
| YDR337W   |
| YEL050C   |
| YGL143C   |
| YGR165W   |
| YGR220C   |
| YHR091C   |
| YJL063C   |
| YKR085C   |
| YLR139C   |
| YMR097C   |
| YNL177C   |
| YOR150W   |
| YPR100W   |
| YPL002C   |
| YBL022C   |
| YBR083W   |
| YGL064C   |

|         |
|---------|
| YMR287C |
| YPL029W |
| YML055W |
| YLL033W |
| YMR228W |
| YJL102W |
| YLR069C |
| YOR187W |
| YDR470C |
| YDR268W |
| YPL097W |
| YPL019C |
| YGR219W |
| YAL004W |
