# Supplementary material
Source: PubMed Central journal article supplement (PMC3512157)
Supplement: 4f00b663de2294ad5c53615d5e9d9813_genetics.112.145573-7.pdf [file 4f00b663de2294ad5c53615d5e9d9813_genetics.112.145573-7.pdf]

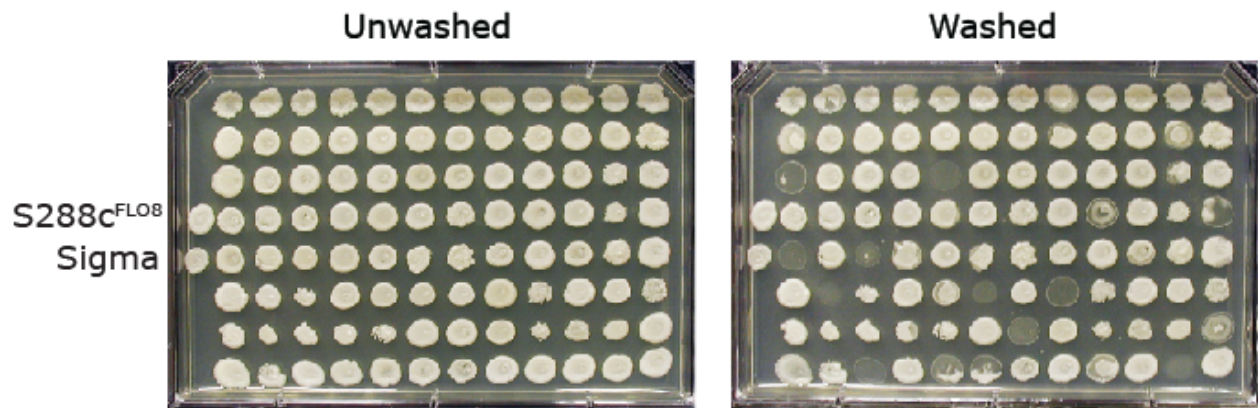

**Figure S4** Regulation of adhesion differs between S288c and Sigma. Adherent, wild-type S288c and Sigma were crossed and from 24 complete tetrads, 15/96 progeny show an adhesion defect. Each column contains two complete tetrads.
