# Supplementary material
Source: PubMed Central journal article supplement (PMC3512157)
Supplement: 06e294d291ed5a00e536524bc57f2520_genetics.112.145573-8.pdf [file 06e294d291ed5a00e536524bc57f2520_genetics.112.145573-8.pdf]

**Table S4 ORFs with intragenic repeat length differences between S288c and Sigma.**

|           |           |           |
|-----------|-----------|-----------|
| YAL035W   | YOR156C   | YJL162C   |
| YAL064W-B | YOR290C   | YKL028W   |
| YBL011W   | YPL049C   | YKL032C   |
| YBR017C   | YPL229W   | YKL105C   |
| YBR030W   | YPR142C   | YKR092C   |
| YBR212W   | YPR143W   | YKR102W   |
| YCR067C   | YPR152C   | YLL010C   |
| YDL005C   | YAL065C   | YLR055C   |
| YDL035C   | YAR050W   | YLR106C   |
| YDL122W   | YBR289W   | YLR114C   |
| YDR133C   | YCL043C   | YLR177W   |
| YDR134C   | YDL037C   | YLR406C-A |
| YDR232W   | YDL039C   | YML049C   |
| YDR273W   | YDL058W   | YML113W   |
| YDR299W   | YDR093W   | YMR016C   |
| YEL007W   | YDR150W   | YMR044W   |
| YFL024C   | YDR420W   | YMR124W   |
| YFL033C   | YDR517W   | YMR173W   |
| YGL013C   | YER011W   | YMR173W-A |
| YGL237C   | YER030W   | YMR317W   |
| YGR014W   | YER075C   | YNL271C   |
| YHL020C   | YFL010C   | YNL327W   |
| YHR030C   | YFL010W-A | YNR052C   |
| YJL187C   | YGL014W   | YOR010C   |
| YKL023W   | YGR160W   | YOR054C   |
| YKL108W   | YHL028W   | YOR113W   |
| YKL163W   | YHR077C   | YOR267C   |
| YKR072C   | YIL011W   | YPL216W   |
| YLL008W   | YIL031W   | YPR021C   |
| YLR175W   | YIL115C   | YPR123C   |
| YLR330W   | YIL119C   | YPR124W   |
| YML074C   | YIR010W   |           |
| YMR070W   | YIR019C   |           |
| YMR136W   | YIR023W   |           |
| YMR164C   | YJL020C   |           |
| YNL186W   | YJL078C   |           |
| YOL051W   | YJL123C   |           |
| YOR053W   | YJL130C   |           |
