# Supplementary material
Source: PubMed Central journal article supplement (PMC3512157)
Supplement: 9c9536a9feefec6b56e116364c616632_genetics.112.145573-12.pdf [file 9c9536a9feefec6b56e116364c616632_genetics.112.145573-12.pdf]

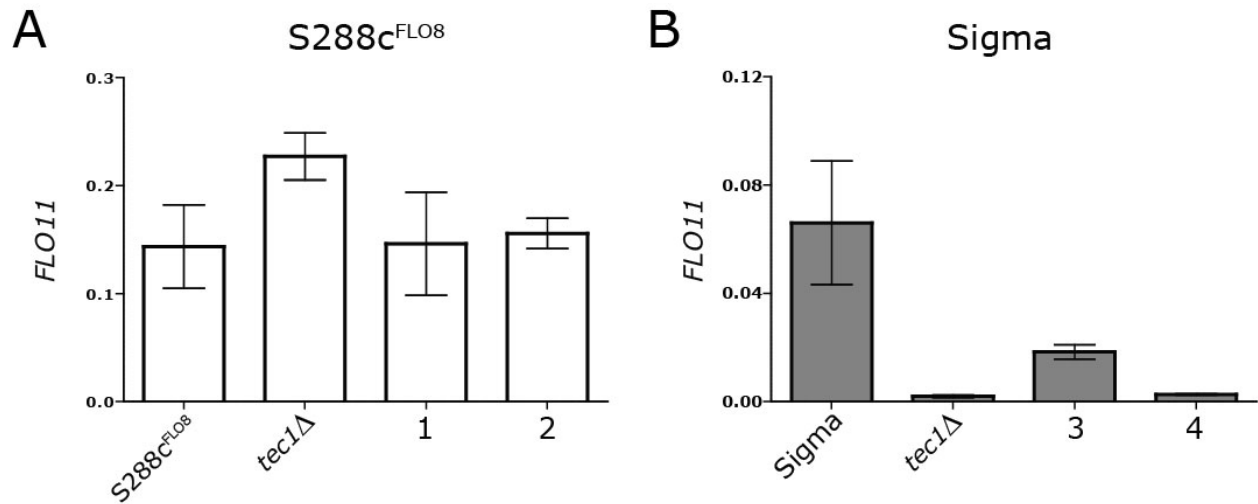

**Figure S1** S288c with *FLO11pr<sup>Sigma</sup>::FLO11* is still fMAPK independent. qPCR assay of *FLO11* transcript levels was performed on (A) S288c and (B) Sigma strains carrying *FLO11* promoter swaps. Mean *FLO11* levels normalized to *ACT1* levels are presented  $\pm$  SD. Strains with their endogenous *FLO11* promoter are labeled with their relevant genotype. Strains carrying a swapped *FLO11* promoter are labeled numerically: (1) S288c *FLO11pr<sup>Sigma</sup>::FLO11*; (2) S288c *FLO11pr<sup>Sigma</sup>::FLO11, tec1Δ*; (3) Sigma *FLO11pr<sup>Sigma</sup>::FLO11, tec1Δ*; (4) Sigma *FLO11pr<sup>S288c</sup>::FLO11, tec1Δ*.

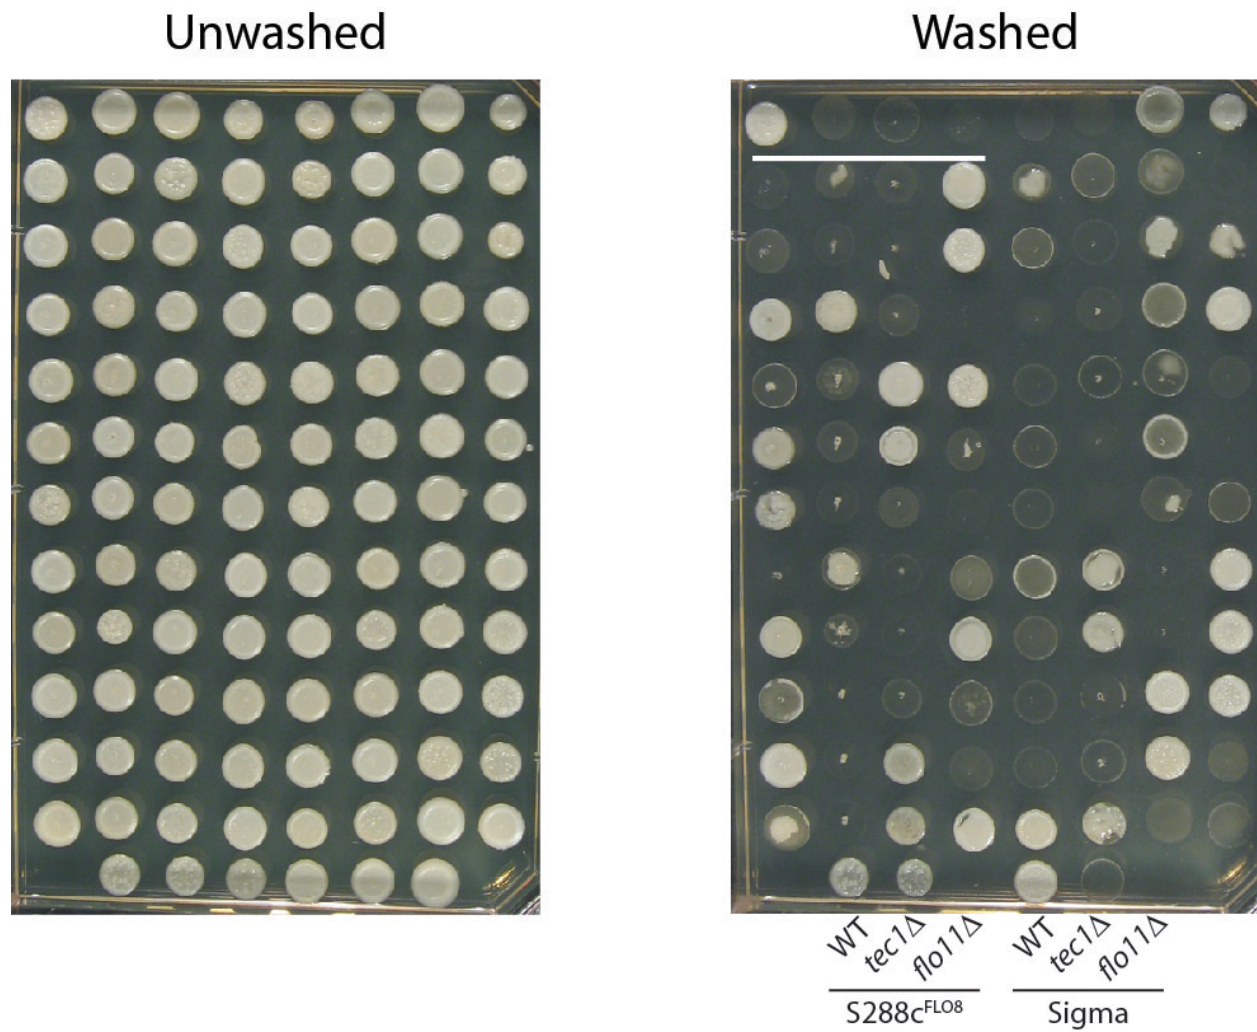

**Figure S2** *tec1Δ* bypass is a complex trait. Agar adhesion assays of 24 tetrads from an S288c *tec1Δ* x Sigma *tec1Δ* cross. Two complete tetrads per row with one example underlined. Parental strains and controls spotted on the bottom of the plate. The same plate is shown before and after washing.

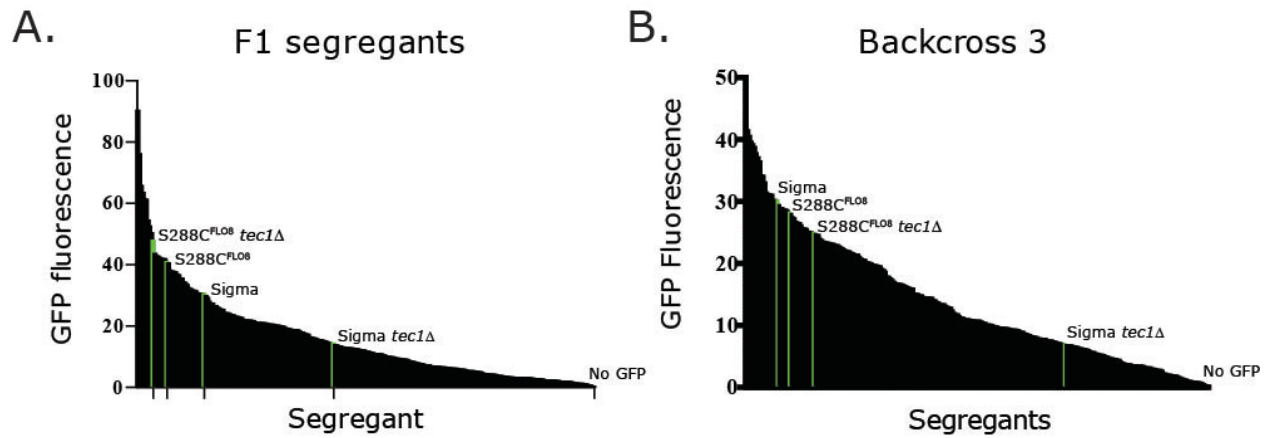

**Figure S3** fMAPK bypass of *FLO11* expression is a complex quantitative trait. GFP fluorescence, measured in arbitrary units for (A) 276 F1 meiotic progeny from a *S288c* / *Sigma FLO11pr::GFP* / *FLO11pr::GFP tec1Δ* / *tec1Δ* diploid or (B) 276 meiotic progeny from the third generation of backcrossing (see methods). The average GFP fluorescence normalized to OD600 of 3 biological replicates are plotted. The progeny are sorted from highest to lowest fluorescence. Fluorescence of control strains are labeled and shown in green.

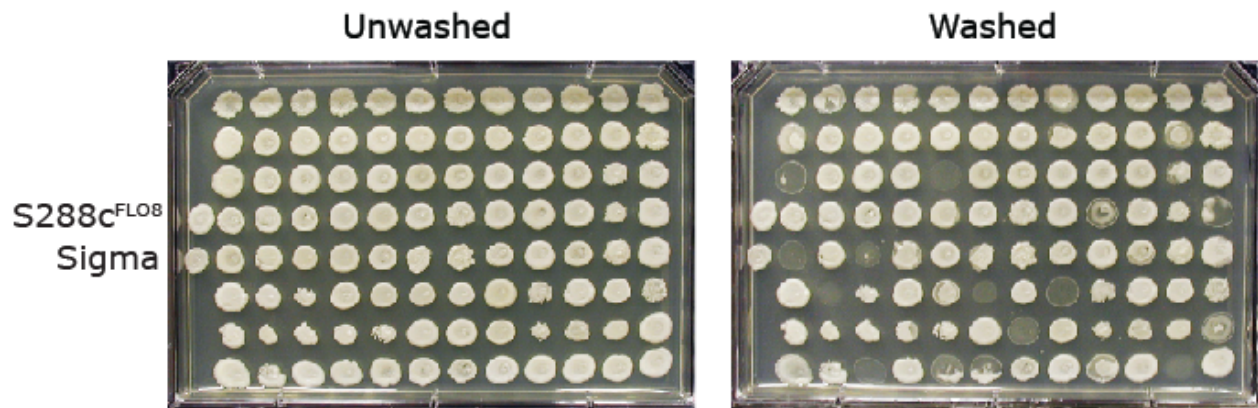

**Figure S4** Regulation of adhesion differs between S288c and Sigma. Adherent, wild-type S288c and Sigma were crossed and from 24 complete tetrads, 15/96 progeny show an adhesion defect. Each column contains two complete tetrads.

# *RPI1*

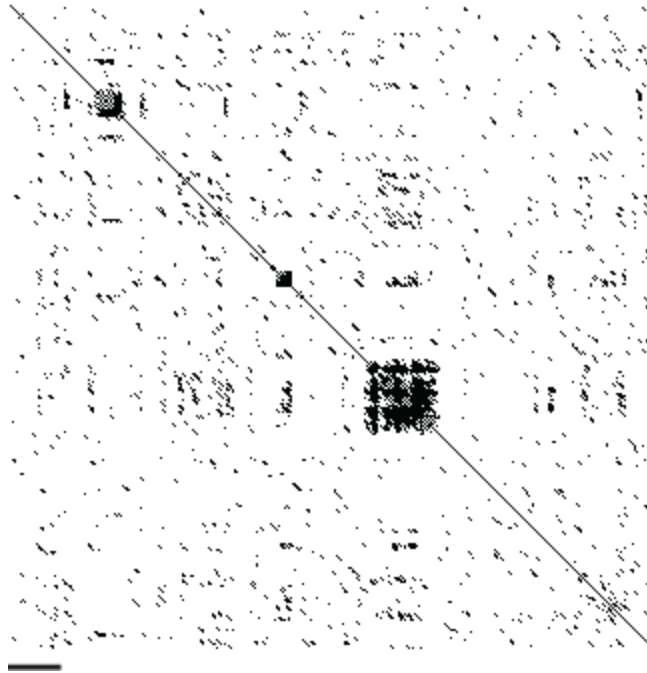

**Figure S5** *RPI1* contains intragenic repeats. Dot plot analysis of the S288c allele of *RPI1* nucleotide sequence compared against itself. Repeat regions produce a characteristic box pattern. The horizontal bar represents 100 nt. The plot was generated using <http://www.vivo.colostate.edu/molkit/dnadot/> with a window size of 9 and a mismatch limit of 2.

A

Repeat #1

```

S288c TCCAGTTCAAATTCGAAATTCGAACTCCAATTCTAATTCGAACTCCAAC
w303 TCCAGTTCAAATTCGAAATTCGAACTCCAATTCTAATTCGAACTCCAAC
SK1 TCCAGTTCAAATTCGAAATTCGAACTCCAATTCTAATTCGAACTCCAAC
NCYC110 TCCAGTTCAAATTCGAAATTCGAACTCCAATTCTAATTCGAACTCCAAC
YJM789 TCCAGTTCAAATTCGAAATTCGAACTCCAATTCTAATTCGAACTCCAAC
RM11 TCCAGTTCTAATTCTAATTCGAACTCCAAC-----
y55 TCCAGTTCTAATTCTAATTCGAACTCCAAC-----
Sigma TCCAGTTCTAATTCTAATTCGAACTCCAAC-----
      S S S N S N S N S N S N S N S N S N

```

B

Repeat #2

```

S288c AACAGAATGGTACTAATGATAATATTAATAACCATTATTATAATAATTGTAACAATAACAATAATAATTTAA-----CAATAGTAACAATAGCAACAATAATAATAGCAATAATAATTAATAGGAATAGTAACTATAGTACTAAT
w303 AACAGAATGGTACTAATGATAATATTAATAACCATTATTATAATAATTGTAACAATAACAATAATAATTTAA-----CAATAGTAACAATAGCAACAATAATAATAGCAATAATAATTAATAGGAATAGTAACTATAGTACTAAT
SK1 AACAGAATGGTACTAATGATAATATTAATAACCATTATTATAATAATAGTAACAATAACAATAATAATTTAA-----CAATAGTAACAATAGCAACAATAATAATAGCAATAATAATTAATAGGAATAGTAACTATAGTACTAAT
NCYC110 AACAGAATGGTACTAATGATAATATTAATAACCATTATTATAATAATAGTAACAATAACAATAATAATTTAA-----CAATAGTAACAATAGCAACAATAATAATAGCAATAATAATTAATAGGAATAGTAACTATAGTACTAAT
YJM789 AACAGAATGGTACTAATGATAATATTAATAACCATTATTATAATAATAGTAACAATAACAATAATAATTTAA-----CAATAGTAACAATAGCAACAATAATAATAGCAATAATAATTAATAGGAATAGTAACTATAGTACTAAT
RM11 AACAGAATGGTACTAATGATAATATTAATAACCATTATTATAATAATAGTAACAATAACAATAATAATTATAACAATAAGTAA-----CAATAATAATAATAGTAACAATAATAATAGCAATAATAATTAATAGGAATAGTAACTATAGTACTAAT
y55 AACAGAATGGTACTAATGATAATATTAATAACCATTATTATAATAATAGTAACAATAACAATAATAATTATAACAATAAGTAA-----CAATAATAATAATAGTAACAATAATAATAGCAATAATAATTAATAGGAATAGTAACTATAGTACTAAT
Sigma AACAGAATGGTACTAATGATAATATTAATAACCATTATTATAATAATAGTAACAATAACAATAATAATTATAACAATAAGTAA-----CAATAATAATAATAGTAACAATAATAATAGCAATAATAATTAATAGGAATAGTAACTATAGTACTAAT
      N K N G T N D N I N N H Y Y N N S N N N N N N N N N N S N N N N N S N N N N S N N N N S N N N N S N N I N R N S N H S T N

```

**Figure S6** Comparison of *RPI1* repeat regions between different *S. cerevisiae* strains. The sequences for the repeat regions from *RPI1* were aligned using ClustalW. (A) 5' repeat region and (B) central repeat region. For repeat #1 the translation for the S288c sequence is shown, and for repeat #2 the translation for the Sigma sequence is shown. Strain names in blue are wild isolates and nucleotides in red represent nucleotide polymorphisms. In S288c, the repeats account for 16% of the coding sequence (195/1224 bases). The 5' repeat region consists of a hexanucleotide repeat. In S288c there are nine repeated units while in Sigma there are only six repeated units. The central repeat region consists of a trinucleotide repeat. In S288c there are 46 repeated units but in Sigma they have expanded to 63 repeated units. Both repeats encode primarily for serines and asparagines.

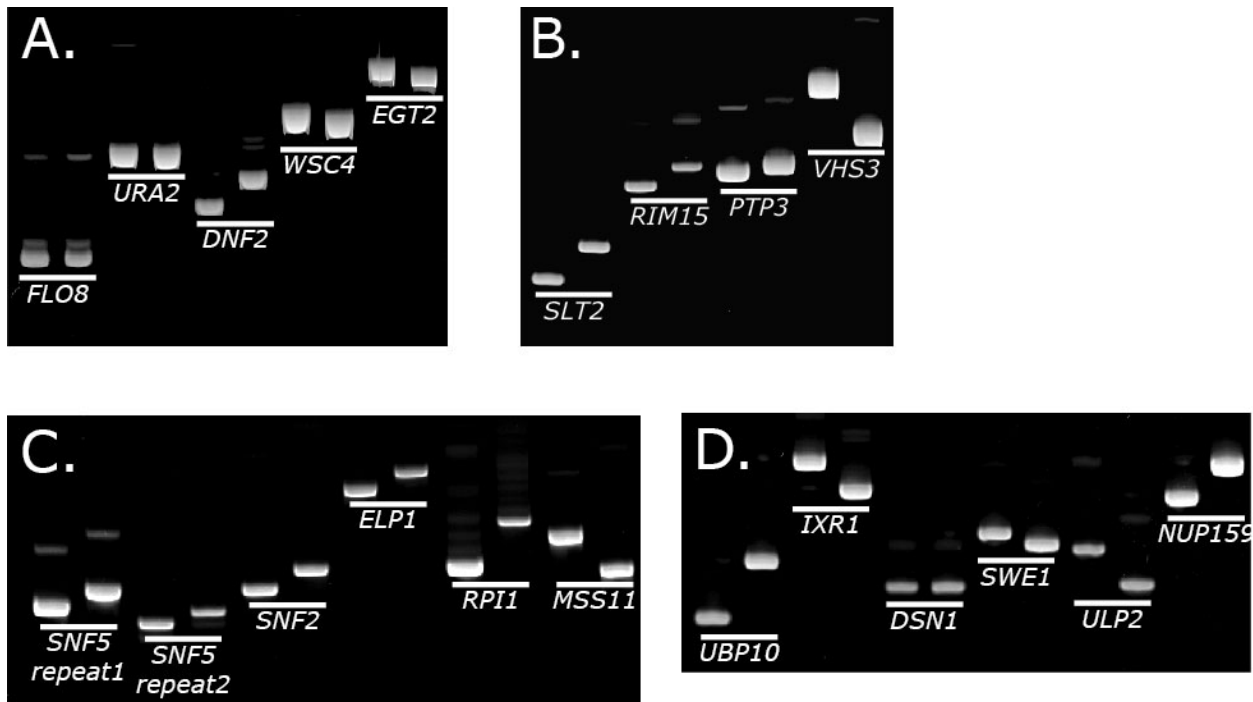

**Figure S7** Many genes have intragenic tandem repeats that differ in size between S288c and Sigma. Four of five gels used to examine the length differences between S288c and Sigma for 24 genes and *FLO8* which was used as a control for a gene without repeats. 22/24 genes had the predicted repeat length differences. The gene *SNF5* has two repeat regions that both changed in size. For each pair the left sample is S288c and the right sample is Sigma.

**Table S1 Deletions leading to an Ahs- phenotype only in S288c.**

|         |           |         |         |
|---------|-----------|---------|---------|
| YAL054C | YIR020C   | YOR082C | YBR231C |
| YNL020C | YJL218W   | YOR154W | YBR289W |
| YOR043W | YJR018W   | YOR183W | YDR073W |
| YDR226W | YJR054W   | YOR186W | YDR334W |
| YBL080C | YJR080C   | YOR200W | YJL176C |
| YKR039W | YKL023W   | YOR225W | YOR290C |
| YBR068C | YKL044W   | YOR258W | YOL012C |
| YDR127W | YKL090W   | YOR285W | YDL074C |
| YPR060C | YKL094W   | YPL017C | YDR469W |
| YPR020W | YLL030C   | YPL068C | YDR207C |
| YLR431C | YLL055W   | YPL182C | YBR107C |
| YCR002C | YLR021W   | YPL184C | YDR254W |
| YAR030C | YLR065C   | YPL216W | YDR318W |
| YBL031W | YLR125W   | YPL220W | YGR275W |
| YBL046W | YLR168C   | YPL246C | YPR046W |
| YBR033W | YLR184W   | YPL257W | YER068W |
| YBR139W | YLR352W   | YPL260W | YAL012W |
| YCL005W | YLR358C   | YPR170C | YER056C |
| YCL036W | YLR374C   | YER086W | YMR032W |
| YCR016W | YLR434C   | YDR200C | YNL166C |
| YCR095C | YML010C-B | YCL058C | YNL229C |
| YDL021W | YML010W-A | YBL006C | YLR420W |
| YDL073W | YMR135W-A | YPR030W | YML106W |
| YDR003W | YMR158C-B | YER083C | YJL115W |
| YDR248C | YMR191W   | YCR017C | YOL090W |
| YDR514C | YMR316C-A | YGL027C | YLR418C |
| YER039C | YMR326C   | YHR181W | YBR228W |
| YER048C | YNL023C   | YDL225W | YGL058W |
| YER060W | YNL170W   | YBR200W | YML021C |
| YFL015C | YNL175C   | YHL003C | YOR144C |
| YGL214W | YNL226W   | YLL026W | YDR364C |
| YGR071C | YNR025C   | YJR060W | YCL061C |
| YHL017W | YOL032W   | YDR176W | YMR048W |
| YHR080C | YOL042W   | YGL066W | YBL082C |
| YHR210C | YOL048C   | YLR055C | YKL213C |
| YIL059C | YOL159C   | YNL107W | YDR069C |
| YIL086C | YOR021C   | YDR485C | YDR320C |
| YIR014W | YOR029W   | YML041C | YNR006W |



|           |
|-----------|
| YJL095W   |
| YKR054C   |
| YBR159W   |
| YBR171W   |
| YGR135W   |
| YFL011W   |
| YHR094C   |
| YBR133C   |
| YOR178C   |
| YNL117W   |
| YLR330W   |
| YJL062W   |
| YDL035C   |
| YOR101W   |
| YKR029C   |
| YOL064C   |
| YGL045W   |
| YHL007C   |
| YOL101C   |
| YKR042W   |
| YOL091W   |
| YDL115C   |
| YLR219W   |
| YML128C   |
| YMR167W   |
| YMR031W-A |
| YJR051W   |
| YLR180W   |
| YGR163W   |
| YAL047C   |
| YPL241C   |
| YLR368W   |
| YDR258C   |
| YNL076W   |
| YCL016C   |
| YDR378C   |
| YKL009W   |
| YMR125W   |
| YBR034C   |

|         |
|---------|
| YDR432W |
| YDR195W |
| YGR019W |
| YPR101W |
| YJR117W |
| YPR049C |
| YOL044W |
| YGR004W |
| YNL173C |
| YER053C |
| YFL031W |
| YAL013W |
| YDR174W |
| YNR052C |
| YKL043W |
| YJL129C |
| YDL230W |
| YJL183W |
| YKL139W |
| YIL148W |
| YGL236C |
| YCL037C |
| YDR500C |
| YHL033C |
| YKL167C |
| YLR185W |
| YNL265C |
| YOR096W |
| YOR182C |
| YPL090C |
| YOR138C |
| YHR034C |
| YOR288C |
| YMR091C |
| YER110C |
| YGL153W |
| YIR004W |
| YLR024C |
| YGL203C |

|         |
|---------|
| YPR087W |
| YER020W |
| YML035C |
| YBR221C |
| YIL119C |
| YKL109W |
| YAL024C |
| YER059W |
| YPL219W |
| YMR179W |
| YML014W |
| YOL105C |
| YOR008C |
| YGL244W |
| YHR087W |
| YNR060W |
| YBL075C |
| YGR055W |
| YGL033W |
| YLR453C |
| YGR104C |
| YHR041C |
| YPL144W |
| YPL258C |
| YNL248C |
| YJL189W |
| YGR054W |
| YNL125C |
| YOR081C |
| YPL212C |
| YDR354W |
| YKL211C |
| YCL075W |
| YDR330W |
| YHL016C |
| YPR036W |
| YLR373C |
| YMR174C |
| YHL019C |

|         |
|---------|
| YBR053C |
|---------|

**Table S2 Deletions leading to an Ahs- phenotype only in Sigma.**

|           |           |           |           |
|-----------|-----------|-----------|-----------|
| YKR024C   | YGR162W   | YPL031C   | YIR021W   |
| YHR114W   | YAL048C   | YDL044C   | YER161C   |
| YML022W   | YPL259C   | YBR191W   | YGR123C   |
| YLR278C   | YLR370C   | YGR105W   | YDL069C   |
| YGL258W   | YNL271C   | YKL119C   | YDR197W   |
| YGR271C-A | YMR267W   | YOR085W   | YML024W   |
| YML117W   | YDR079W   | YNR051C   | YBR165W   |
| YOR267C   | YDR529C   | YEL059C-A | YER154W   |
| YMR044W   | YPL132W   | YPL086C   | YLR384C   |
| YOR213C   | YLR204W   | YPL024W   | YDR074W   |
| YMR127C   | YLR315W   | YIL008W   | YHL034C   |
| YCR009C   | YER156C   | YFR019W   | YDR096W   |
| YCR088W   | YLR375W   | YPL193W   | YDL081C   |
| YIL034C   | YFR048W   | YJL124C   | YOL023W   |
| YMR008C   | YGL188C-A | YPR040W   | YIL125W   |
| YGR040W   | YGL211W   | YDR512C   | YDR120C   |
| YGL014W   | YGL228W   | YNL098C   | YGR020C   |
| YDR005C   | YKL037W   | YOL051W   | YOR332W   |
| YNL053W   | YOR141C   | YDR289C   | YFL054C   |
| YOR002W   | YKL110C   | YGR257C   | YGR272C   |
| YOR067C   | YDR276C   | YLL041C   | YBR026C   |
| YDL159W   | YBL007C   | YNL037C   | YHR011W   |
| YGL019W   | YBR245C   | YOR136W   | YCR105W   |
| YGR188C   | YGR062C   | YEL051W   | YPR116W   |
| YLR362W   | YLR337C   | YKL080W   | YCR079W   |
| YHR021C   | YLR056W   | YDL067C   | YER014C-A |
| YPR043W   | YGR014W   | YLR295C   | YLR390W-A |
| YBR189W   | YGR037C   | YBL099W   | YGR229C   |
| YGR232W   | YHL038C   | YDR298C   | YDR359C   |
| YER118C   | YGL252C   | YBL066C   | YLR385C   |
| YMR312W   | YAL002W   | YBR162C   | YOL068C   |
| YPL101W   | YOR334W   | YLR404W   | YMR263W   |
| YKL143W   | YOL115W   | YNL097C   | YCR077C   |
| YDR184C   | YGL003C   | YGR180C   | YHR120W   |
| YDL190C   | YPL005W   | YCR086W   | YER061C   |
| YEL060C   | YDR140W   | YDR129C   | YHR067W   |
| YDL005C   | YAL023C   | YML008C   | YBL071W-A |
| YGL025C   | YDR477W   | YGL084C   | YER014W   |

|         |
|---------|
| YEL065W |
| YOR198C |
| YPL055C |
| YDR393W |
| YHL020C |
| YGL246C |
| YER117W |
| YDL191W |
| YGL129C |
| YMR158W |
| YPL104W |
| YPR166C |
| YDR175C |
| YPL040C |
| YPL118W |
| YLR192C |
| YJL180C |
| YER017C |
| YMR089C |
| YNL121C |
| YPL148C |
| YILO49W |
| YNL119W |
| YHR084W |
| YHR111W |
| YIR019C |
| YFL026W |
| YNL180C |
| YDR194C |
| YKL149C |
| YKL194C |
| YPR163C |
| YBR127C |
| YMR293C |
| YKL055C |
| YOR221C |
| YPL271W |
| YDR332W |
| YOR305W |

|           |
|-----------|
| YBR163W   |
| YER087W   |
| YGL107C   |
| YGR102C   |
| YMR066W   |
| YMR098C   |
| YOR205C   |
| YLR443W   |
| YILO84C   |
| YOR330C   |
| YLR382C   |
| YKL134C   |
| YNL073W   |
| YGR171C   |
| YCR028C-A |
| YDR296W   |
| YOL095C   |
| YGL219C   |
| YNL213C   |
| YGR101W   |
| YLL006W   |
| YOL009C   |
| YOR211C   |
| YML062C   |
| YLR435W   |
| YDL090C   |
| YBR146W   |
| YBL038W   |
| YBR251W   |
| YBR268W   |
| YBR282W   |
| YCR003W   |
| YCR024C   |
| YCR046C   |
| YCR071C   |
| YDL045W-A |
| YDR237W   |
| YDR322W   |
| YDR347W   |

|           |
|-----------|
| YDR405W   |
| YER050C   |
| YGR215W   |
| YHR147C   |
| YHR168W   |
| YILO93C   |
| YKL003C   |
| YKL138C   |
| YKL155C   |
| YKL170W   |
| YKR006C   |
| YLR312W-A |
| YLR439W   |
| YMR024W   |
| YMR193W   |
| YNL005C   |
| YNL081C   |
| YNL252C   |
| YPL173W   |
| YPR047W   |
| YBL090W   |
| YDR115W   |
| YDR337W   |
| YEL050C   |
| YGL143C   |
| YGR165W   |
| YGR220C   |
| YHR091C   |
| YJL063C   |
| YKR085C   |
| YLR139C   |
| YMR097C   |
| YNL177C   |
| YOR150W   |
| YPR100W   |
| YPL002C   |
| YBL022C   |
| YBR083W   |
| YGL064C   |

|         |
|---------|
| YMR287C |
| YPL029W |
| YML055W |
| YLL033W |
| YMR228W |
| YJL102W |
| YLR069C |
| YOR187W |
| YDR470C |
| YDR268W |
| YPL097W |
| YPL019C |
| YGR219W |
| YAL004W |

**Table S3** Deletions leading to an Ahs- phenotype only in both S288c and Sigma.

|         |
|---------|
| YKL007W |
| YBR023C |
| YPL203W |
| YBL058W |
| YGR056W |
| YOL001W |
| YOL072W |
| YLR357W |
| YOL076W |
| YPL181W |
| YDR350C |
| YMR154C |

|         |
|---------|
| YKR001C |
| YKL185W |
| YNL183C |
| YDR392W |
| YOR035C |
| YJL140W |
| YHR167W |
| YKL204W |
| YJR113C |
| YCL008C |
| YJR102C |
| YOL004W |

|         |
|---------|
| YDR065W |
| YMR116C |
| YDL233W |
| YEL007W |
| YGR122W |
| YBR095C |
| YOR275C |
| YOR030W |
| YLR025W |
| YMR077C |
| YCR084C |
| YDL006W |

|         |
|---------|
| YDR462W |
| YNR037C |
| YLR417W |
| YMR164C |
| YGR200C |
| YGR063C |
| YMR063W |
| YHL027W |
| YNL294C |
| YJL175W |

**Table S4 ORFs with intragenic repeat length differences between S288c and Sigma.**

|           |           |           |
|-----------|-----------|-----------|
| YAL035W   | YOR156C   | YJL162C   |
| YAL064W-B | YOR290C   | YKL028W   |
| YBL011W   | YPL049C   | YKL032C   |
| YBR017C   | YPL229W   | YKL105C   |
| YBR030W   | YPR142C   | YKR092C   |
| YBR212W   | YPR143W   | YKR102W   |
| YCR067C   | YPR152C   | YLL010C   |
| YDL005C   | YAL065C   | YLR055C   |
| YDL035C   | YAR050W   | YLR106C   |
| YDL122W   | YBR289W   | YLR114C   |
| YDR133C   | YCL043C   | YLR177W   |
| YDR134C   | YDL037C   | YLR406C-A |
| YDR232W   | YDL039C   | YML049C   |
| YDR273W   | YDL058W   | YML113W   |
| YDR299W   | YDR093W   | YMR016C   |
| YEL007W   | YDR150W   | YMR044W   |
| YFL024C   | YDR420W   | YMR124W   |
| YFL033C   | YDR517W   | YMR173W   |
| YGL013C   | YER011W   | YMR173W-A |
| YGL237C   | YER030W   | YMR317W   |
| YGR014W   | YER075C   | YNL271C   |
| YHL020C   | YFL010C   | YNL327W   |
| YHR030C   | YFL010W-A | YNR052C   |
| YJL187C   | YGL014W   | YOR010C   |
| YKL023W   | YGR160W   | YOR054C   |
| YKL108W   | YHL028W   | YOR113W   |
| YKL163W   | YHR077C   | YOR267C   |
| YKR072C   | YIL011W   | YPL216W   |
| YLL008W   | YIL031W   | YPR021C   |
| YLR175W   | YIL115C   | YPR123C   |
| YLR330W   | YIL119C   | YPR124W   |
| YML074C   | YIR010W   |           |
| YMR070W   | YIR019C   |           |
| YMR136W   | YIR023W   |           |
| YMR164C   | YJL020C   |           |
| YNL186W   | YJL078C   |           |
| YOL051W   | YJL123C   |           |
| YOR053W   | YJL130C   |           |

**Table S5 List of strains used in this study**

| Strain       | Genotype                                                                                                           | Source                           |
|--------------|--------------------------------------------------------------------------------------------------------------------|----------------------------------|
| BY4741       | S288c MATa his3Δ1 leu2Δ0 ura3Δ0 met15Δ0 flo8-1                                                                     | Brachmann et al. (1998)          |
| yBC37        | S288c MATa his3Δ1 leu2Δ0 ura3Δ0 met15Δ0 FLO8                                                                       | this study                       |
| yBC06A10     | S288c MATa his3Δ1 leu2Δ0 ura3Δ0 met15Δ0 FLO8 tec1Δ::KanMX4                                                         | this study                       |
| yBC06B5      | S288c MATa his3Δ1 leu2Δ0 ura3Δ0 met15Δ0 FLO8 ste7Δ::KanMX4                                                         | this study                       |
| yBC06G7      | S288c MATa his3Δ1 leu2Δ0 ura3Δ0 met15Δ0 FLO8 ste11Δ::KanMX4                                                        | this study                       |
| yBC07A3      | S288c MATa his3Δ1 leu2Δ0 ura3Δ0 met15Δ0 FLO8 kss1Δ::KanMX4                                                         | this study                       |
| yBC06B5      | S288c MATa his3Δ1 leu2Δ0 ura3Δ0 met15Δ0 FLO8 ste12Δ::KanMX4                                                        | this study                       |
| yBC0192      | S288c MATa his3Δ1 leu2Δ0 ura3Δ0 met15Δ0 flo11pr <sup>S288c</sup> Δ::FLO11pr <sup>Sigma</sup><br>FLO8               | this study                       |
| yBC0195      | S288c MATa his3Δ1 leu2Δ0 ura3Δ0 met15Δ0<br>flo11pr <sup>S288c</sup> Δ::FLO11pr <sup>Sigma</sup> tec1Δ::KanMX4 FLO8 | this study                       |
| yBC11E2      | S288c MATa his3Δ1 leu2Δ0 ura3Δ0 met15Δ0 flo11Δ::GFP-URA3 FLO8                                                      | this study                       |
| yBC11H2      | S288c MATa his3Δ1 leu2Δ0 ura3Δ0 met15Δ0 flo11Δ::GFP-URA3<br>tec1Δ::KanMX4 FLO8                                     | this study                       |
| yBC16A3      | S288c MATa ura3Δ0 FLO8                                                                                             | this study                       |
| yBC16F4      | S288c MATa /α ura3Δ0/ura3Δ0 FLO8/FLO8                                                                              | this study                       |
| yBC20A1      | S288c MATa ura3Δ0 tec1Δ::hyg FLO8                                                                                  | this study                       |
| yBC20D1      | S288c MATα ura3Δ0 tec1Δ::hyg FLO8                                                                                  | this study                       |
| yBC20A3      | S288c MATa /α ura3Δ0/ura3Δ0 tec1Δ::hyg/tec1Δhyg FLO8/FLO8                                                          | this study                       |
| yBC11E8      | S288c MATa his3Δ1 leu2Δ0 ura3Δ0 met15Δ0 flo11Δ::HIS3PEST FLO8                                                      | this study                       |
| yBC11H8      | S288c MATa his3Δ1 leu2Δ0 ura3Δ0 met15Δ0 flo11Δ::HIS3PEST<br>tec1Δ::KanMX4 FLO8                                     | this study                       |
| yBC18A1      | S288c MATa ura3Δ0 rpi1Δ::URA3 FLO8                                                                                 | this study                       |
| yBC18A6      | S288c MATa ura3Δ0 rpi1Δ::RPI1 <sup>Sigma</sup> FLO8                                                                | this study                       |
| yBC18A8      | S288c MATa ura3Δ0 rpi1Δ::RPI1 <sup>Sigma</sup> tecΔ1::KanMX4 FLO8                                                  | this study                       |
| yBC29A9      | S288c MATa ura3Δ0 RPI1-3xFLAG-URA3 FLO8                                                                            | this study                       |
| yBC29D9      | S288c MATa ura3Δ0 rpi1Δ::RPI1 <sup>Sigma</sup> -3xFLAG-URA3 FLO8                                                   | this study                       |
| 10560-6B     | Sigma MATα his3::hisG leu2::hisG trp1::hisG ura3-52                                                                | Fink Collection                  |
| yBC0172      | Sigma MATa his3::hisG leu2::hisG trp1::hisG ura3-52                                                                | this study                       |
| Sigma tec1Δ  | MATa can1Δ::STE2pr-Sphis5 lyp1Δ::STE3pr-LEU2 his3::hisG leu2Δ ura3Δ<br>tec1Δ::KanMX4                               | Dowell and Ryan et al.<br>(2010) |
| Sigma ste7Δ  | MATa can1Δ::STE2pr-Sphis5 lyp1Δ::STE3pr-LEU2 his3::hisG leu2Δ ura3Δ<br>ste7Δ::KanMX4                               | Dowell and Ryan et al.<br>(2010) |
| Sigma ste11Δ | MATa can1Δ::STE2pr-Sphis5 lyp1Δ::STE3pr-LEU2 his3::hisG leu2Δ ura3Δ<br>ste11Δ::KanMX4                              | Dowell and Ryan et al.<br>(2010) |
| Sigma kss1Δ  | MATa can1Δ::STE2pr-Sphis5 lyp1Δ::STE3pr-LEU2 his3::hisG leu2Δ ura3Δ<br>kss1Δ::KanMX4                               | Dowell and Ryan et al.<br>(2010) |

|                     |                                                                                                                                                                                    |                               |
|---------------------|------------------------------------------------------------------------------------------------------------------------------------------------------------------------------------|-------------------------------|
| Sigma <i>ste12Δ</i> | <i>MATa can1Δ::STE2pr-Sphis5 lyp1Δ::STE3pr-LEU2 his3::hisG leu2Δ ura3Δ ste12Δ::KanMX4</i>                                                                                          | Dowell and Ryan et al. (2010) |
| yBC0193             | Sigma <i>MATa his3::hisG leu2::hisG trp1::hisG ura3-52 flo11pr<sup>Sigma</sup>Δ::FLO11pr<sup>S288c</sup></i>                                                                       | this study                    |
| yBC0196             | Sigma <i>MATa his3::hisG leu2::hisG trp1::hisG ura3-52 flo11pr<sup>Sigma</sup>Δ::FLO11pr<sup>S288c</sup> tec1Δ::KanMX4</i>                                                         | this study                    |
| yBC11G1             | Sigma <i>MATa his3::hisG leu2::hisG trp1::hisG ura3-52 flo11Δ::GFP-URA3</i>                                                                                                        | this study                    |
| yBC11B2             | Sigma <i>MATa his3::hisG leu2::hisG trp1::hisG ura3-52 flo11Δ::GFP-URA3 tec1Δ::KanMX4</i>                                                                                          | this study                    |
| yBC16H3             | Sigma <i>MATa ura3-52</i>                                                                                                                                                          | this study                    |
| yBC16B4             | Sigma <i>MATα ura3-52</i>                                                                                                                                                          | this study                    |
| yBC16G4             | Sigma <i>MATa /α ura3-52/ura3-52</i>                                                                                                                                               | this study                    |
| yBC20G1             | Sigma <i>MATa ura3-52 tec1Δ::hyg</i>                                                                                                                                               | this study                    |
| yBC20B2             | Sigma <i>MATα ura3-52 tec1Δ::hyg</i>                                                                                                                                               | this study                    |
| yBC20C3             | Sigma <i>MATa /α ura3-52/ura3-52 tec1Δ::hyg/tec1Δhyg FLO8/FLO8</i>                                                                                                                 | this study                    |
| yBC11A7             | Sigma <i>MATa his3::hisG leu2::hisG trp1::hisG ura3-52 flo11Δ::HIS3-PEST</i>                                                                                                       | this study                    |
| yBC11D7             | Sigma <i>MATa his3::hisG leu2::hisG trp1::hisG ura3-52 flo11Δ::HIS3-PEST tec1Δ::KanMX4</i>                                                                                         | this study                    |
| yBC18G1             | Sigma <i>MATa ura3-52 rpi1Δ::URA3</i>                                                                                                                                              | this study                    |
| yBC18G6             | Sigma <i>MATa ura3-52 rpi1Δ::RPI1<sup>S288c</sup></i>                                                                                                                              | this study                    |
| yBC18G8             | Sigma <i>MATa ura3-52 rpi1Δ::RPI1<sup>Sigma</sup> tec1Δ::KanMX4</i>                                                                                                                | this study                    |
| yBC29G9             | Sigma <i>MATa ura3-52 RPI1-3xFLAG-URA3</i>                                                                                                                                         | this study                    |
| yBC29B10            | Sigma <i>MATa ura3-52 rpi1Δ::RPI1<sup>Sigma</sup>-3xFLAG-URA3</i>                                                                                                                  | this study                    |
| yBC09H1             | <i>S288c<sup>FLO8</sup>/Sigma MATa /α ura3Δ0/ura3-52 his3Δ0/his3::hisG leu2Δ0/leu2::hisG met15Δ0/MET15 TRP1/trp1::hisG tec1Δ::hyg/tec1Δ::hyg flo11Δ::GFP-URA3/flo11Δ::GFP-URA3</i> | this study                    |
| yBC03A10            | <i>S288c<sup>FLO8</sup>/Sigma MATa /α ura3Δ0/ura3-52 his3Δ0/his3::hisG met15Δ0/MET15 tec1Δ::KanMX4/tec1Δ::KanMX</i>                                                                | this study                    |

**Table S6 List of oligonucleotides used in this study**

| Name   | Sequence (5' to 3')                                                                          | Description                                       |
|--------|----------------------------------------------------------------------------------------------|---------------------------------------------------|
| BCP10  | agtgcttaaccggaacaaacc                                                                        | <i>FLO8F</i>                                      |
| BCP15  | tatgatcatgattacgatgaccgt                                                                     | <i>FLO8R</i>                                      |
| BCP46  | ggaacaagctgagctggac                                                                          | Flanking <i>TEC1</i>                              |
| BCP47  | tcgtggttcatccaagtga                                                                          | Flanking <i>TEC1</i>                              |
| BCP191 | cccaagcgagacctagagtg                                                                         | Flanking <i>STE12</i>                             |
| BCP192 | gaacatcgatgccttcacct                                                                         | Flanking <i>STE12</i>                             |
| BCP195 | aagtgattcgtgggtaacg                                                                          | Flanking <i>STE7</i>                              |
| BCP196 | tgggttattaatcgcttcg                                                                          | Flanking <i>STE7</i>                              |
| BCP199 | attctcgccaacttttct                                                                           | Flanking <i>STE11</i>                             |
| BCP200 | tcttcgtgcttccatctgtg                                                                         | Flanking <i>STE11</i>                             |
| BCP236 | tccccttggtaaagaaatg                                                                          | Flanking <i>kss1</i>                              |
| BCP237 | ttgattacagtcgctcagc                                                                          | Flanking <i>kss1</i>                              |
| BCP249 | GGTTCTAATTAATACTTTTGTAGGCCTCAAAAATCCATATACGCACACTatgac<br>agagcagaaagccctag                  | to replace the <i>FLO11</i> ORF with <i>HIS3</i>  |
| BCP257 | tgatgagggtgaagggaac                                                                          | <i>RPI1</i> swap                                  |
| BCP316 | ggTGCATCCAACCTTGAACATTTTCGAGAAAGC                                                            | For amplifying PEST seq from <i>CLN2</i>          |
| BCP317 | CTATATACTTGGGTATTGCCATACC                                                                    | For amplifying PEST seq from <i>CLN2</i>          |
| BCP320 | GCTTTCGAAATGTTCAAGTTGGATGCaccataagaacaccttggggag                                             | linearize pRS313 to add PEST seq from <i>CLN2</i> |
| BCP321 | GGTATGGGCAATACCCAAGTAATATAGtgacaccgattatttaaagctg                                            | linearize pRS313 to add PEST seq from <i>CLN2</i> |
| BCP324 | atttaagaatgaaaacatcgtaatgaagaacgaacatgttggattgtatcaCTATATACTTGGGT<br>ATTGCCATACC             | To replace <i>FLO11</i> with <i>HIS3PEST</i>      |
| BCP358 | CTTTTTTTAAGTCTTTTTTTTTTCTCATCTTTTATTACTGATATTTATAAAgatt<br>gtactgagagtgcac                   | <i>rpi1::ura3</i>                                 |
| BCP359 | TAGAATTAAGGGGTAGAAAATTTATGGTGGAGACTCCCGATACATACTctgtgcg<br>gtatttcacaccg                     | <i>rpi1::ura3</i>                                 |
| BCP360 | cgattcgtttaactatttctcagtc                                                                    | <i>RPI1</i> swap                                  |
| BCP412 | ctcaacagcagatccagcag                                                                         | <i>MSS11F</i> repeats                             |
| BCP413 | gaaggcataagtcgggtga                                                                          | <i>MSS11R</i> repeats                             |
| BCP419 | cattgaagccgaacaagaatg                                                                        | <i>RPI1F</i> repeats                              |
| BCP420 | cttgactgaatgatgctctgggtg                                                                     | <i>RPI1R</i> repeats                              |
| BCP423 | tgcaagatttcaggctgttt                                                                         | <i>SLT2F</i> repeats                              |
| BCP424 | atccacatctgaaggctgct                                                                         | <i>SLT2R</i> repeats                              |
| BCP534 | GACTACAAGGATGATGACGATAAAGGTGACTATAAAGATCATGACATTGATTATA<br>AAGACCATGACTAAGcaggtcgacaaccctaat | to build a C terminal flag tagging construct      |
| BCP535 | GCGGCCGCATAGGCCACT                                                                           | to build a C terminal flag tagging construct      |
| BCP536 | ACCGTTGCATAATATGTCAACTTCAGACTCAGAAAATTTATGCAACAACATgactac<br>aaggatgatgacgata                | C-terminally tag <i>RPI1</i> with FLAG            |
| BCP537 | GAATTAAGGGGTAGAAAATTTATGGTGGAGACTCCCGATACATACTTTAgcggcc<br>gcataggccact                      | C-terminally tag <i>RPI1</i> with FLAG            |
| BCP572 | cattaaacccgtggaacagc                                                                         | <i>GAL11F</i> repeats                             |
| BCP573 | gggaataggtgccacttca                                                                          | <i>GAL11R</i> repeats                             |



|        |                       |                        |
|--------|-----------------------|------------------------|
| BCP574 | ctgaatgggtggatccaaat  | <i>URA2F</i> repeats   |
| BCP575 | agaacagatggatcacctgga | <i>URA2R</i> repeats   |
| BCP576 | gaaccggcaagacttaacca  | <i>EPL1F</i> repeats   |
| BCP577 | ttctgttcgcttctgaattg  | <i>EPL1R</i> repeats   |
| BCP580 | ggacaggagcaggaagaaaa  | <i>NUP159F</i> repeats |
| BCP581 | tccgaatgcagatgtaccaa  | <i>NUP159R</i> repeats |
| BCP584 | atgggcataaacggtgacat  | <i>VHS3F</i> repeats   |
| BCP585 | agatcgctgtagccctcctt  | <i>VHS3R</i> repeats   |
| BCP586 | aacctgcacaggaacatcc   | <i>TFA1F</i> repeats   |
| BCP587 | ctgaagcagtgaggtagca   | <i>TFA1R</i> repeats   |
| BCP588 | cccacgactacaagcacaaa  | <i>WSC4F</i> repeats   |
| BCP589 | ctgtagaatgggggctga    | <i>WSC4R</i> repeats   |
| BCP628 | aaggctgcagtggtcaagt   | <i>DNF2F</i> repeats   |
| BCP629 | atatctgaactccccgatgg  | <i>DNF2R</i> repeats   |
| BCP632 | tacaatcccacgcagtttca  | <i>ULP2F</i> repeats   |
| BCP633 | ttccgtagttgcatcatcaaa | <i>ULP2R</i> repeats   |
| BCP634 | gctggaaaacgactcaaagc  | <i>SPT8F</i> repeats   |
| BCP635 | agcagccttttctcatcat   | <i>SPT8R</i> repeats   |
| BCP636 | atgatgagcaaaaggctgct  | <i>SPT8F</i> repeats   |
| BCP637 | tccattagcagaggcttctgt | <i>SPT8R</i> repeats   |
| BCP638 | ctgtgtcaggacgcataga   | <i>RIM15F</i> repeats  |
| BCP639 | tccttggggaaaactgaaaa  | <i>RIM15R</i> repeats  |
| BCP640 | tcaaattgatgccaggttc   | <i>SNF2F</i> repeats   |
| BCP641 | ttgctcggcagtaaacattg  | <i>SNF2R</i> repeats   |
| BCP642 | agtacggggaccttgaacct  | <i>SWE1F</i> repeats   |
| BCP643 | tacgagaatccacgctttcc  | <i>SWE1R</i> repeats   |
| BCP644 | cagctggtgttcagggaaat  | <i>PTP3F</i> repeats   |
| BCP645 | ccaaatcaggccaatttttc  | <i>PTP3R</i> repeats   |
| BCP646 | acaacggcgatgaaaagaat  | <i>MED2F</i> repeats   |
| BCP647 | tgccgttatcgtcattgttg  | <i>MED2R</i> repeats   |
| BCP648 | aggctggataacctgcaaga  | <i>DSN1F</i> repeats   |
| BCP649 | ttgcagtgcacatctcacta  | <i>DSN1R</i> repeats   |
| BCP650 | caagaccattcgtgcagta   | <i>IXR1F</i> repeats   |
| BCP651 | taaggcgttgtttgtttg    | <i>IXR1R</i> repeats   |
| BCP654 | atgggaactccaacctgaca  | <i>PGD1F</i> repeats   |
| BCP655 | agtcgactgctgtgcgtaga  | <i>PGD1R</i> repeats   |
| BCP656 | ccaataacaccccgtacag   | <i>PGD1F</i> repeats   |
| BCP657 | tactgtggttaggctgctg   | <i>PGD1R</i> repeats   |
| BCP658 | tagtttgaaggaacgcgaca  | <i>UBP10F</i> repeats  |
| BCP659 | gaaccaagttttcaccaatg  | <i>UBP10R</i> repeats  |
| BCP660 | atgattcagcaacgacacca  | <i>SNF5F</i> repeats   |

|                 |                          |                      |
|-----------------|--------------------------|----------------------|
| BCP661          | aggaggagggtagaagtgc      | <i>SNF5R</i> repeats |
| BCP662          | tgtgcacaacaacaagtgc      | <i>SNF5F</i> repeats |
| BCP663          | gctggtgctgctgtattgg      | <i>SNF5R</i> repeats |
| <i>FLO11</i> FW | cactttgaagttatgccacacaag | <i>FLO11</i> qPCR    |
| <i>FLO11</i> RV | cttgcatattgagcggcactac   | <i>FLO11</i> qPCR    |
| <i>ACT1</i> FW  | ctccaccactgctgaaagagaa   | <i>ACT1</i> qPCR     |
| <i>ACT1</i> RV  | ccaaggcgacgtaacatagtttt  | <i>ACT1</i> qPCR     |
