# Supplementary material
Source: PubMed Central journal article supplement (PMC3512157)
Supplement: 016c6158792fdbf2e124e8d2986b351f_genetics.112.145573-2.pdf [file 016c6158792fdbf2e124e8d2986b351f_genetics.112.145573-2.pdf]

**Table S1 Deletions leading to an Ahs- phenotype only in S288c.**

|         |           |         |         |
|---------|-----------|---------|---------|
| YAL054C | YIR020C   | YOR082C | YBR231C |
| YNL020C | YJL218W   | YOR154W | YBR289W |
| YOR043W | YJR018W   | YOR183W | YDR073W |
| YDR226W | YJR054W   | YOR186W | YDR334W |
| YBL080C | YJR080C   | YOR200W | YJL176C |
| YKR039W | YKL023W   | YOR225W | YOR290C |
| YBR068C | YKL044W   | YOR258W | YOL012C |
| YDR127W | YKL090W   | YOR285W | YDL074C |
| YPR060C | YKL094W   | YPL017C | YDR469W |
| YPR020W | YLL030C   | YPL068C | YDR207C |
| YLR431C | YLL055W   | YPL182C | YBR107C |
| YCR002C | YLR021W   | YPL184C | YDR254W |
| YAR030C | YLR065C   | YPL216W | YDR318W |
| YBL031W | YLR125W   | YPL220W | YGR275W |
| YBL046W | YLR168C   | YPL246C | YPR046W |
| YBR033W | YLR184W   | YPL257W | YER068W |
| YBR139W | YLR352W   | YPL260W | YAL012W |
| YCL005W | YLR358C   | YPR170C | YER056C |
| YCL036W | YLR374C   | YER086W | YMR032W |
| YCR016W | YLR434C   | YDR200C | YNL166C |
| YCR095C | YML010C-B | YCL058C | YNL229C |
| YDL021W | YML010W-A | YBL006C | YLR420W |
| YDL073W | YMR135W-A | YPR030W | YML106W |
| YDR003W | YMR158C-B | YER083C | YJL115W |
| YDR248C | YMR191W   | YCR017C | YOL090W |
| YDR514C | YMR316C-A | YGL027C | YLR418C |
| YER039C | YMR326C   | YHR181W | YBR228W |
| YER048C | YNL023C   | YDL225W | YGL058W |
| YER060W | YNL170W   | YBR200W | YML021C |
| YFL015C | YNL175C   | YHL003C | YOR144C |
| YGL214W | YNL226W   | YLL026W | YDR364C |
| YGR071C | YNR025C   | YJR060W | YCL061C |
| YHL017W | YOL032W   | YDR176W | YMR048W |
| YHR080C | YOL042W   | YGL066W | YBL082C |
| YHR210C | YOL048C   | YLR055C | YKL213C |
| YIL059C | YOL159C   | YNL107W | YDR069C |
| YIL086C | YOR021C   | YDR485C | YDR320C |
| YIR014W | YOR029W   | YML041C | YNR006W |

|           |
|-----------|
| YJL095W   |
| YKR054C   |
| YBR159W   |
| YBR171W   |
| YGR135W   |
| YFL011W   |
| YHR094C   |
| YBR133C   |
| YOR178C   |
| YNL117W   |
| YLR330W   |
| YJL062W   |
| YDL035C   |
| YOR101W   |
| YKR029C   |
| YOL064C   |
| YGL045W   |
| YHL007C   |
| YOL101C   |
| YKR042W   |
| YOL091W   |
| YDL115C   |
| YLR219W   |
| YML128C   |
| YMR167W   |
| YMR031W-A |
| YJR051W   |
| YLR180W   |
| YGR163W   |
| YAL047C   |
| YPL241C   |
| YLR368W   |
| YDR258C   |
| YNL076W   |
| YCL016C   |
| YDR378C   |
| YKL009W   |
| YMR125W   |
| YBR034C   |

|         |
|---------|
| YDR432W |
| YDR195W |
| YGR019W |
| YPR101W |
| YJR117W |
| YPR049C |
| YOL044W |
| YGR004W |
| YNL173C |
| YER053C |
| YFL031W |
| YAL013W |
| YDR174W |
| YNR052C |
| YKL043W |
| YJL129C |
| YDL230W |
| YJL183W |
| YKL139W |
| YIL148W |
| YGL236C |
| YCL037C |
| YDR500C |
| YHL033C |
| YKL167C |
| YLR185W |
| YNL265C |
| YOR096W |
| YOR182C |
| YPL090C |
| YOR138C |
| YHR034C |
| YOR288C |
| YMR091C |
| YER110C |
| YGL153W |
| YIR004W |
| YLR024C |
| YGL203C |

|         |
|---------|
| YPR087W |
| YER020W |
| YML035C |
| YBR221C |
| YIL119C |
| YKL109W |
| YAL024C |
| YER059W |
| YPL219W |
| YMR179W |
| YML014W |
| YOL105C |
| YOR008C |
| YGL244W |
| YHR087W |
| YNR060W |
| YBL075C |
| YGR055W |
| YGL033W |
| YLR453C |
| YGR104C |
| YHR041C |
| YPL144W |
| YPL258C |
| YNL248C |
| YJL189W |
| YGR054W |
| YNL125C |
| YOR081C |
| YPL212C |
| YDR354W |
| YKL211C |
| YCL075W |
| YDR330W |
| YHL016C |
| YPR036W |
| YLR373C |
| YMR174C |
| YHL019C |

|         |
|---------|
| YBR053C |
|---------|
