# Supplementary material
Source: PubMed Central journal article supplement (PMC3512157)
Supplement: 55a594c187bf7d6db797fca1b6ff8052_genetics.112.145573-3.pdf [file 55a594c187bf7d6db797fca1b6ff8052_genetics.112.145573-3.pdf]

**Table S3** Deletions leading to an Ahs- phenotype only in both S288c and Sigma.

|         |
|---------|
| YKL007W |
| YBR023C |
| YPL203W |
| YBL058W |
| YGR056W |
| YOL001W |
| YOL072W |
| YLR357W |
| YOL076W |
| YPL181W |
| YDR350C |
| YMR154C |

|         |
|---------|
| YKR001C |
| YKL185W |
| YNL183C |
| YDR392W |
| YOR035C |
| YJL140W |
| YHR167W |
| YKL204W |
| YJR113C |
| YCL008C |
| YJR102C |
| YOL004W |

|         |
|---------|
| YDR065W |
| YMR116C |
| YDL233W |
| YEL007W |
| YGR122W |
| YBR095C |
| YOR275C |
| YOR030W |
| YLR025W |
| YMR077C |
| YCR084C |
| YDL006W |

|         |
|---------|
| YDR462W |
| YNR037C |
| YLR417W |
| YMR164C |
| YGR200C |
| YGR063C |
| YMR063W |
| YHL027W |
| YNL294C |
| YJL175W |
