# Supplementary material
Source: PubMed Central journal article supplement (PMC3512157)
Supplement: 79aec837a091b52abb490146c656af82_genetics.112.145573-6.pdf [file 79aec837a091b52abb490146c656af82_genetics.112.145573-6.pdf]

**Table S6 List of oligonucleotides used in this study**

| Name   | Sequence (5' to 3')                                                                         | Description                                       |
|--------|---------------------------------------------------------------------------------------------|---------------------------------------------------|
| BCP10  | agtgcttaaccggaacaaacc                                                                       | <i>FLO8F</i>                                      |
| BCP15  | tatgatcatgattacgatgaccgt                                                                    | <i>FLO8R</i>                                      |
| BCP46  | ggaacaagctgagctggac                                                                         | Flanking <i>TEC1</i>                              |
| BCP47  | tcgtggttcatccaagtga                                                                         | Flanking <i>TEC1</i>                              |
| BCP191 | cccaagcgagacctagagtg                                                                        | Flanking <i>STE12</i>                             |
| BCP192 | gaacatcgatgccttcacct                                                                        | Flanking <i>STE12</i>                             |
| BCP195 | aagtgattcgtgggtaacg                                                                         | Flanking <i>STE7</i>                              |
| BCP196 | tgggttattaatcgcttcg                                                                         | Flanking <i>STE7</i>                              |
| BCP199 | attctcgccaacttttct                                                                          | Flanking <i>STE11</i>                             |
| BCP200 | tcttcgtgcttccatctgtg                                                                        | Flanking <i>STE11</i>                             |
| BCP236 | tccccttggtaaagaaatg                                                                         | Flanking <i>kss1</i>                              |
| BCP237 | ttgattacagtcgctcagc                                                                         | Flanking <i>kss1</i>                              |
| BCP249 | GGTTCTAATTAATACTTTTGTAGGCCTCAAAAATCCATATACGCACACTatgac<br>agagcagaaagccctag                 | to replace the <i>FLO11</i> ORF with <i>HIS3</i>  |
| BCP257 | tgatgagggtgaagggaac                                                                         | <i>RPI1</i> swap                                  |
| BCP316 | ggTGCATCCAACCTTGAACATTTTCGAGAAAGC                                                           | For amplifying PEST seq from <i>CLN2</i>          |
| BCP317 | CTATATACTTGGGTATTGCCATACC                                                                   | For amplifying PEST seq from <i>CLN2</i>          |
| BCP320 | GCTTTCGAAATGTTCAAGTTGGATGCaccataagaacacctttgtggag                                           | linearize pRS313 to add PEST seq from <i>CLN2</i> |
| BCP321 | GGTATGGGCAATACCCAAGTAATATAGtgacaccgattatttaaagctg                                           | linearize pRS313 to add PEST seq from <i>CLN2</i> |
| BCP324 | atttaagaatgaaaacatcgtaatgaagaacgaacatgttggattgtatcaCTATATACTTGGGT<br>ATTGCCATACC            | To replace <i>FLO11</i> with <i>HIS3PEST</i>      |
| BCP358 | CTTTTTTTAAGTCTTTTTTTTTTCTCATCTTTTATTACTGATATTTATAAAgatt<br>gtactgagagtgcac                  | <i>rpi1::ura3</i>                                 |
| BCP359 | TAGAATTAAGGGGTAGAAAATTTATGGTGGAGACTCCCGATACATACTctgtgcg<br>gtatttcacaccg                    | <i>rpi1::ura3</i>                                 |
| BCP360 | cgattcgtttaactatttctcagtc                                                                   | <i>RPI1</i> swap                                  |
| BCP412 | ctcaacagcagatccagcag                                                                        | <i>MSS11F</i> repeats                             |
| BCP413 | gaaggcataagtcgggtga                                                                         | <i>MSS11R</i> repeats                             |
| BCP419 | cattgaagccgaacaagaatg                                                                       | <i>RPI1F</i> repeats                              |
| BCP420 | cttgactgaatgatgctctgggtg                                                                    | <i>RPI1R</i> repeats                              |
| BCP423 | tgcaagatttcaggctgttt                                                                        | <i>SLT2F</i> repeats                              |
| BCP424 | atccacatctgaaggctgct                                                                        | <i>SLT2R</i> repeats                              |
| BCP534 | GACTACAAGGATGATGACGATAAAGGTGACTATAAAGATCATGACATTGATTATA<br>AAGACCATGACTAAgaggtcgacaaccctaat | to build a C terminal flag tagging construct      |
| BCP535 | GCGGCCGCATAGGCCACT                                                                          | to build a C terminal flag tagging construct      |
| BCP536 | ACCGTTGCATAATATGTCAACTTCAGACTCAGAAAATTTATGCAACAACATgactac<br>aaggatgatgacgata               | C-terminally tag <i>RPI1</i> with FLAG            |
| BCP537 | GAATTAAGGGGTAGAAAATTTATGGTGGAGACTCCCGATACATACTTTAgcggcc<br>gcataggccact                     | C-terminally tag <i>RPI1</i> with FLAG            |
| BCP572 | cattaaacctggaacagc                                                                          | <i>GAL11F</i> repeats                             |
| BCP573 | gggaataggtgccacttca                                                                         | <i>GAL11R</i> repeats                             |

|        |                       |                        |
|--------|-----------------------|------------------------|
| BCP574 | ctgaatgggtggatccaaat  | <i>URA2F</i> repeats   |
| BCP575 | agaacagatggatcacctgga | <i>URA2R</i> repeats   |
| BCP576 | gaaccggcaagacttaacca  | <i>EPL1F</i> repeats   |
| BCP577 | ttctgttcgcttctgaattg  | <i>EPL1R</i> repeats   |
| BCP580 | ggacaggagcaggaagaaaa  | <i>NUP159F</i> repeats |
| BCP581 | tccgaatgcagatgtaccaa  | <i>NUP159R</i> repeats |
| BCP584 | atgggcataaacgggtgacat | <i>VHS3F</i> repeats   |
| BCP585 | agatcgctgtagccctcctt  | <i>VHS3R</i> repeats   |
| BCP586 | aacctgcacaggaacatcc   | <i>TFA1F</i> repeats   |
| BCP587 | ctgaagcagtggcagtagca  | <i>TFA1R</i> repeats   |
| BCP588 | cccacgactacaagcacaaa  | <i>WSC4F</i> repeats   |
| BCP589 | ctgtagaatgggggctga    | <i>WSC4R</i> repeats   |
| BCP628 | aaggctgcagtggtcaagt   | <i>DNF2F</i> repeats   |
| BCP629 | atatctgaactccccgatgg  | <i>DNF2R</i> repeats   |
| BCP632 | tacaatcccacgcagtttca  | <i>ULP2F</i> repeats   |
| BCP633 | ttccgtagttgcatcatcaaa | <i>ULP2R</i> repeats   |
| BCP634 | gctggaaaacgactcaaagc  | <i>SPT8F</i> repeats   |
| BCP635 | agcagccttttctcatcat   | <i>SPT8R</i> repeats   |
| BCP636 | atgatgagcaaaaggctgct  | <i>SPT8F</i> repeats   |
| BCP637 | tccattagcagaggcttctgt | <i>SPT8R</i> repeats   |
| BCP638 | ctgtgtcaggacgcataga   | <i>RIM15F</i> repeats  |
| BCP639 | tccttggggaaaactgaaaa  | <i>RIM15R</i> repeats  |
| BCP640 | tcaaatgtgatccaggttc   | <i>SNF2F</i> repeats   |
| BCP641 | ttgctcggcagtaaacattg  | <i>SNF2R</i> repeats   |
| BCP642 | agtacggggaccttgaacct  | <i>SWE1F</i> repeats   |
| BCP643 | tacgagaatccacgctttcc  | <i>SWE1R</i> repeats   |
| BCP644 | cagctggtgttcagggaaat  | <i>PTP3F</i> repeats   |
| BCP645 | ccaaatcaggccaatttttc  | <i>PTP3R</i> repeats   |
| BCP646 | acaacggc gatgaaaagaat | <i>MED2F</i> repeats   |
| BCP647 | tgccgttatcgtcattgttg  | <i>MED2R</i> repeats   |
| BCP648 | aggctggataacctgcaaga  | <i>DSN1F</i> repeats   |
| BCP649 | ttgcagtgcacatctcacta  | <i>DSN1R</i> repeats   |
| BCP650 | caagaccattcgtgcagta   | <i>IXR1F</i> repeats   |
| BCP651 | taaggcgtttgtttgttg    | <i>IXR1R</i> repeats   |
| BCP654 | atgggaactccaacctgaca  | <i>PGD1F</i> repeats   |
| BCP655 | agtcgactgctgtgcgtaga  | <i>PGD1R</i> repeats   |
| BCP656 | ccaataacaccccgtacag   | <i>PGD1F</i> repeats   |
| BCP657 | tactgtggttaggctgctg   | <i>PGD1R</i> repeats   |
| BCP658 | tagtttgaaggaacgcgaca  | <i>UBP10F</i> repeats  |
| BCP659 | gaaccaagttttaccaatg   | <i>UBP10R</i> repeats  |
| BCP660 | atgattcagcaacgacacca  | <i>SNF5F</i> repeats   |

|                 |                          |                      |
|-----------------|--------------------------|----------------------|
| BCP661          | aggaggagggtagaagtgc      | <i>SNF5R</i> repeats |
| BCP662          | tgtgcacaacaacaagtgc      | <i>SNF5F</i> repeats |
| BCP663          | gctgttgcgctgtatttg       | <i>SNF5R</i> repeats |
| <i>FLO11</i> FW | cactttgaagttatgccacacaag | <i>FLO11</i> qPCR    |
| <i>FLO11</i> RV | cttgcatattgagcggcactac   | <i>FLO11</i> qPCR    |
| <i>ACT1</i> FW  | ctccaccactgctgaaagagaa   | <i>ACT1</i> qPCR     |
| <i>ACT1</i> RV  | ccaaggcgacgtaacatagttt   | <i>ACT1</i> qPCR     |
