# Supplementary material
Source: PubMed Central journal article supplement (PMC3512157)
Supplement: 0307e2a11596700f3278a58a98af570d_genetics.112.145573-1.pdf [file 0307e2a11596700f3278a58a98af570d_genetics.112.145573-1.pdf]

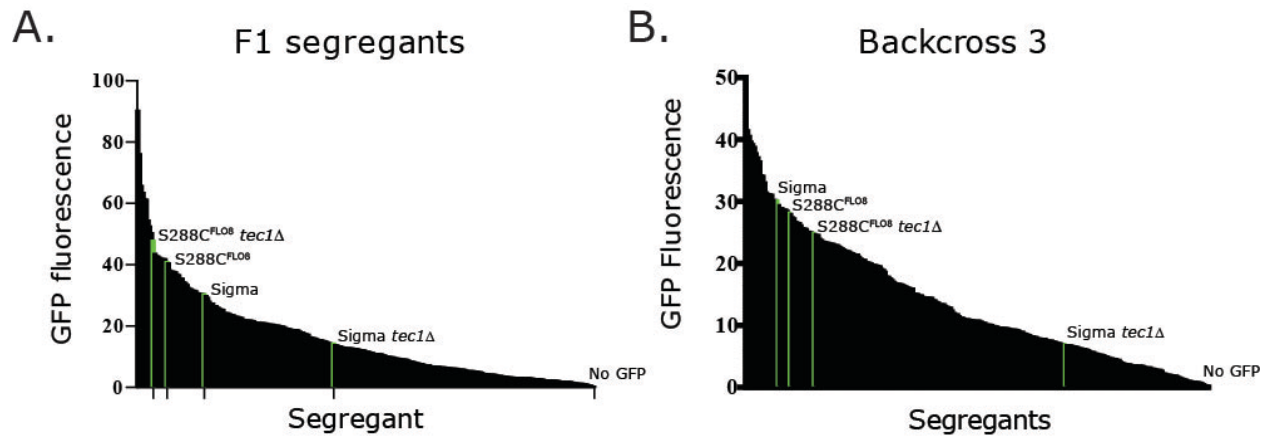

**Figure S3** fMAPK bypass of *FLO11* expression is a complex quantitative trait. GFP fluorescence, measured in arbitrary units for (A) 276 F1 meiotic progeny from a *S288c* / *Sigma FLO11pr::GFP* / *FLO11pr::GFP tec1Δ* / *tec1Δ* diploid or (B) 276 meiotic progeny from the third generation of backcrossing (see methods). The average GFP fluorescence normalized to OD600 of 3 biological replicates are plotted. The progeny are sorted from highest to lowest fluorescence. Fluorescence of control strains are labeled and shown in green.
