# Supplementary material
Source: PubMed Central journal article supplement (PMC3512157)
Supplement: b6b6a9e8bf1a942cbe8010e7210b298b_genetics.112.145573-14.pdf [file b6b6a9e8bf1a942cbe8010e7210b298b_genetics.112.145573-14.pdf]

**Table S5 List of strains used in this study**

| Strain       | Genotype                                                                                                           | Source                           |
|--------------|--------------------------------------------------------------------------------------------------------------------|----------------------------------|
| BY4741       | S288c MATa his3Δ1 leu2Δ0 ura3Δ0 met15Δ0 flo8-1                                                                     | Brachmann et al. (1998)          |
| yBC37        | S288c MATa his3Δ1 leu2Δ0 ura3Δ0 met15Δ0 FLO8                                                                       | this study                       |
| yBC06A10     | S288c MATa his3Δ1 leu2Δ0 ura3Δ0 met15Δ0 FLO8 tec1Δ::KanMX4                                                         | this study                       |
| yBC06B5      | S288c MATa his3Δ1 leu2Δ0 ura3Δ0 met15Δ0 FLO8 ste7Δ::KanMX4                                                         | this study                       |
| yBC06G7      | S288c MATa his3Δ1 leu2Δ0 ura3Δ0 met15Δ0 FLO8 ste11Δ::KanMX4                                                        | this study                       |
| yBC07A3      | S288c MATa his3Δ1 leu2Δ0 ura3Δ0 met15Δ0 FLO8 kss1Δ::KanMX4                                                         | this study                       |
| yBC06B5      | S288c MATa his3Δ1 leu2Δ0 ura3Δ0 met15Δ0 FLO8 ste12Δ::KanMX4                                                        | this study                       |
| yBC0192      | S288c MATa his3Δ1 leu2Δ0 ura3Δ0 met15Δ0 flo11pr <sup>S288c</sup> Δ::FLO11pr <sup>Sigma</sup><br>FLO8               | this study                       |
| yBC0195      | S288c MATa his3Δ1 leu2Δ0 ura3Δ0 met15Δ0<br>flo11pr <sup>S288c</sup> Δ::FLO11pr <sup>Sigma</sup> tec1Δ::KanMX4 FLO8 | this study                       |
| yBC11E2      | S288c MATa his3Δ1 leu2Δ0 ura3Δ0 met15Δ0 flo11Δ::GFP-URA3 FLO8                                                      | this study                       |
| yBC11H2      | S288c MATa his3Δ1 leu2Δ0 ura3Δ0 met15Δ0 flo11Δ::GFP-URA3<br>tec1Δ::KanMX4 FLO8                                     | this study                       |
| yBC16A3      | S288c MATa ura3Δ0 FLO8                                                                                             | this study                       |
| yBC16F4      | S288c MATa /α ura3Δ0/ura3Δ0 FLO8/FLO8                                                                              | this study                       |
| yBC20A1      | S288c MATa ura3Δ0 tec1Δ::hyg FLO8                                                                                  | this study                       |
| yBC20D1      | S288c MATα ura3Δ0 tec1Δ::hyg FLO8                                                                                  | this study                       |
| yBC20A3      | S288c MATa /α ura3Δ0/ura3Δ0 tec1Δ::hyg/tec1Δhyg FLO8/FLO8                                                          | this study                       |
| yBC11E8      | S288c MATa his3Δ1 leu2Δ0 ura3Δ0 met15Δ0 flo11Δ::HIS3PEST FLO8                                                      | this study                       |
| yBC11H8      | S288c MATa his3Δ1 leu2Δ0 ura3Δ0 met15Δ0 flo11Δ::HIS3PEST<br>tec1Δ::KanMX4 FLO8                                     | this study                       |
| yBC18A1      | S288c MATa ura3Δ0 rpi1Δ::URA3 FLO8                                                                                 | this study                       |
| yBC18A6      | S288c MATa ura3Δ0 rpi1Δ::RPI1 <sup>Sigma</sup> FLO8                                                                | this study                       |
| yBC18A8      | S288c MATa ura3Δ0 rpi1Δ::RPI1 <sup>Sigma</sup> tec1Δ::KanMX4 FLO8                                                  | this study                       |
| yBC29A9      | S288c MATa ura3Δ0 RPI1-3xFLAG-URA3 FLO8                                                                            | this study                       |
| yBC29D9      | S288c MATa ura3Δ0 rpi1Δ::RPI1 <sup>Sigma</sup> -3xFLAG-URA3 FLO8                                                   | this study                       |
| 10560-6B     | Sigma MATα his3::hisG leu2::hisG trp1::hisG ura3-52                                                                | Fink Collection                  |
| yBC0172      | Sigma MATa his3::hisG leu2::hisG trp1::hisG ura3-52                                                                | this study                       |
| Sigma tec1Δ  | MATa can1Δ::STE2pr-Sphis5 lyp1Δ::STE3pr-LEU2 his3::hisG leu2Δ ura3Δ<br>tec1Δ::KanMX4                               | Dowell and Ryan et al.<br>(2010) |
| Sigma ste7Δ  | MATa can1Δ::STE2pr-Sphis5 lyp1Δ::STE3pr-LEU2 his3::hisG leu2Δ ura3Δ<br>ste7Δ::KanMX4                               | Dowell and Ryan et al.<br>(2010) |
| Sigma ste11Δ | MATa can1Δ::STE2pr-Sphis5 lyp1Δ::STE3pr-LEU2 his3::hisG leu2Δ ura3Δ<br>ste11Δ::KanMX4                              | Dowell and Ryan et al.<br>(2010) |
| Sigma kss1Δ  | MATa can1Δ::STE2pr-Sphis5 lyp1Δ::STE3pr-LEU2 his3::hisG leu2Δ ura3Δ<br>kss1Δ::KanMX4                               | Dowell and Ryan et al.<br>(2010) |

|                     |                                                                                                                                                                                    |                               |
|---------------------|------------------------------------------------------------------------------------------------------------------------------------------------------------------------------------|-------------------------------|
| Sigma <i>ste12Δ</i> | <i>MATa can1Δ::STE2pr-Sphis5 lyp1Δ::STE3pr-LEU2 his3::hisG leu2Δ ura3Δ ste12Δ::KanMX4</i>                                                                                          | Dowell and Ryan et al. (2010) |
| yBC0193             | Sigma <i>MATa his3::hisG leu2::hisG trp1::hisG ura3-52 flo11pr<sup>Sigma</sup>Δ::FLO11pr<sup>S288c</sup></i>                                                                       | this study                    |
| yBC0196             | Sigma <i>MATa his3::hisG leu2::hisG trp1::hisG ura3-52 flo11pr<sup>Sigma</sup>Δ::FLO11pr<sup>S288c</sup> tec1Δ::KanMX4</i>                                                         | this study                    |
| yBC11G1             | Sigma <i>MATa his3::hisG leu2::hisG trp1::hisG ura3-52 flo11Δ::GFP-URA3</i>                                                                                                        | this study                    |
| yBC11B2             | Sigma <i>MATa his3::hisG leu2::hisG trp1::hisG ura3-52 flo11Δ::GFP-URA3 tec1Δ::KanMX4</i>                                                                                          | this study                    |
| yBC16H3             | Sigma <i>MATa ura3-52</i>                                                                                                                                                          | this study                    |
| yBC16B4             | Sigma <i>MATα ura3-52</i>                                                                                                                                                          | this study                    |
| yBC16G4             | Sigma <i>MATa /α ura3-52/ura3-52</i>                                                                                                                                               | this study                    |
| yBC20G1             | Sigma <i>MATa ura3-52 tec1Δ::hyg</i>                                                                                                                                               | this study                    |
| yBC20B2             | Sigma <i>MATα ura3-52 tec1Δ::hyg</i>                                                                                                                                               | this study                    |
| yBC20C3             | Sigma <i>MATa /α ura3-52/ura3-52 tec1Δ::hyg/tec1Δhyg FLO8/FLO8</i>                                                                                                                 | this study                    |
| yBC11A7             | Sigma <i>MATa his3::hisG leu2::hisG trp1::hisG ura3-52 flo11Δ::HIS3-PEST</i>                                                                                                       | this study                    |
| yBC11D7             | Sigma <i>MATa his3::hisG leu2::hisG trp1::hisG ura3-52 flo11Δ::HIS3-PEST tec1Δ::KanMX4</i>                                                                                         | this study                    |
| yBC18G1             | Sigma <i>MATa ura3-52 rpi1Δ::URA3</i>                                                                                                                                              | this study                    |
| yBC18G6             | Sigma <i>MATa ura3-52 rpi1Δ::RPI1<sup>S288c</sup></i>                                                                                                                              | this study                    |
| yBC18G8             | Sigma <i>MATa ura3-52 rpi1Δ::RPI1<sup>Sigma</sup> tec1Δ::KanMX4</i>                                                                                                                | this study                    |
| yBC29G9             | Sigma <i>MATa ura3-52 RPI1-3xFLAG-URA3</i>                                                                                                                                         | this study                    |
| yBC29B10            | Sigma <i>MATa ura3-52 rpi1Δ::RPI1<sup>Sigma</sup>-3xFLAG-URA3</i>                                                                                                                  | this study                    |
| yBC09H1             | <i>S288c<sup>FLO8</sup>/Sigma MATa /α ura3Δ0/ura3-52 his3Δ0/his3::hisG leu2Δ0/leu2::hisG met15Δ0/MET15 TRP1/trp1::hisG tec1Δ::hyg/tec1Δ::hyg flo11Δ::GFP-URA3/flo11Δ::GFP-URA3</i> | this study                    |
| yBC03A10            | <i>S288c<sup>FLO8</sup>/Sigma MATa /α ura3Δ0/ura3-52 his3Δ0/his3::hisG met15Δ0/MET15 tec1Δ::KanMX4/tec1Δ::KanMX</i>                                                                | this study                    |
