# Supplementary material
Source: PubMed Central journal article supplement (PMC3512157)
Supplement: c3704fd0b4b104b56cb7fd50c048f6ae_genetics.112.145573-13.pdf [file c3704fd0b4b104b56cb7fd50c048f6ae_genetics.112.145573-13.pdf]

# *RPI1*

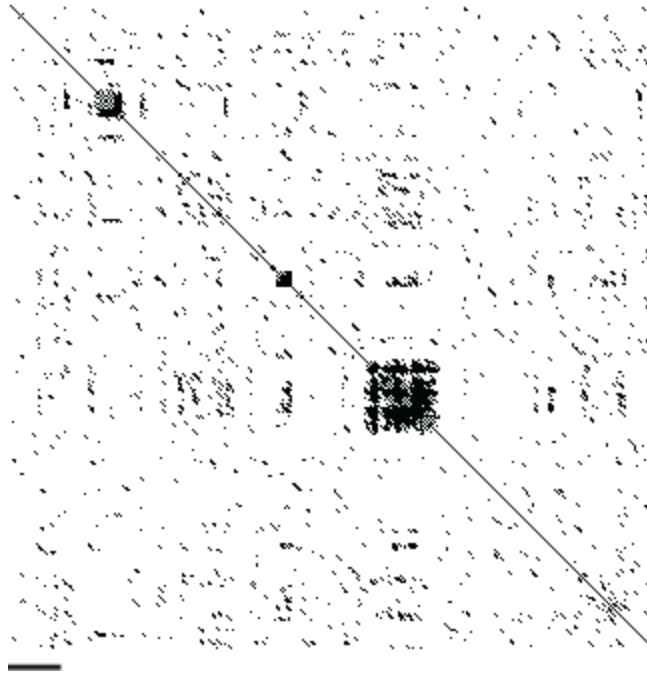

**Figure S5** *RPI1* contains intragenic repeats. Dot plot analysis of the S288c allele of *RPI1* nucleotide sequence compared against itself. Repeat regions produce a characteristic box pattern. The horizontal bar represents 100 nt. The plot was generated using <http://www.vivo.colostate.edu/molkit/dnadot/> with a windows size of 9 and a mismatch limit of 2.
