# Supplementary material
Source: PubMed Central journal article supplement (PMC3512157)
Supplement: ca3a361d82be4fd9e1c57d4da6deae4e_genetics.112.145573-11.pdf [file ca3a361d82be4fd9e1c57d4da6deae4e_genetics.112.145573-11.pdf]

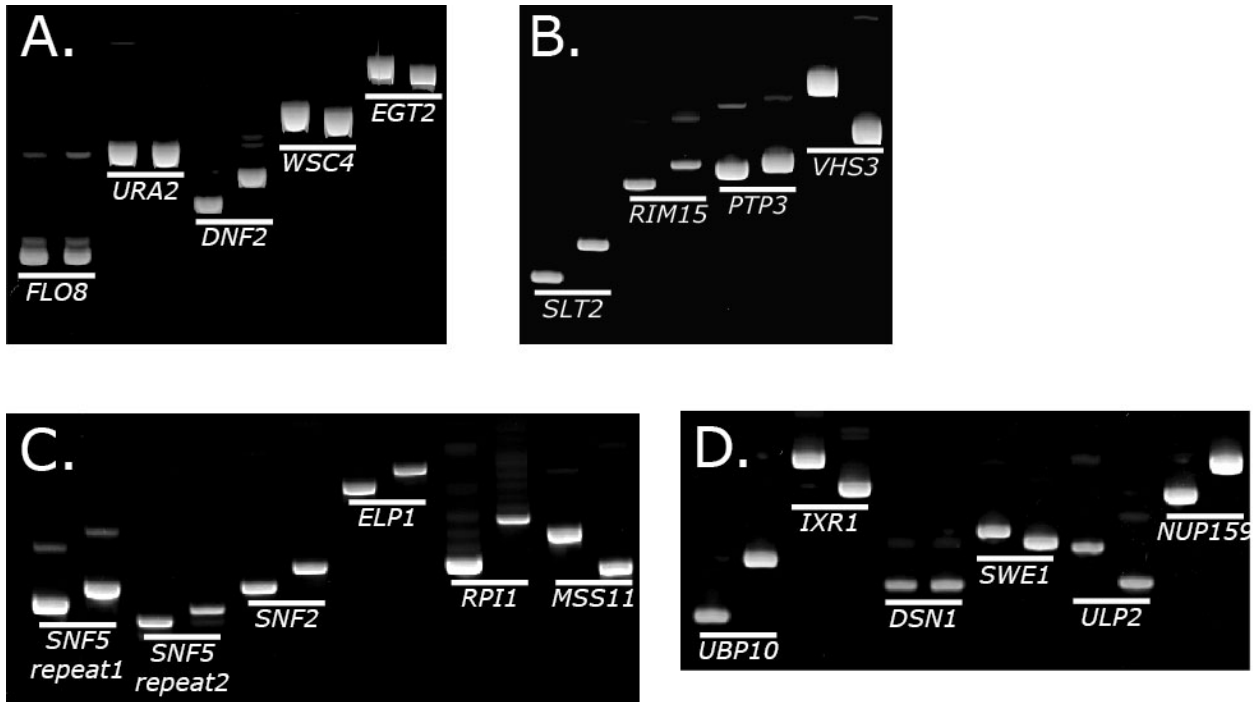

**Figure S7** Many genes have intragenic tandem repeats that differ in size between S288c and Sigma. Four of five gels used to examine the length differences between S288c and Sigma for 24 genes and *FLO8* which was used as a control for a gene without repeats. 22/24 genes had the predicted repeat length differences. The gene *SNF5* has two repeat regions that both changed in size. For each pair the left sample is S288c and the right sample is Sigma.
