# Supplementary material
Source: PubMed Central journal article supplement (PMC3512157)
Supplement: f9807a07d43e6f6a3ff9d8470da0f31b_genetics.112.145573-4.pdf [file f9807a07d43e6f6a3ff9d8470da0f31b_genetics.112.145573-4.pdf]

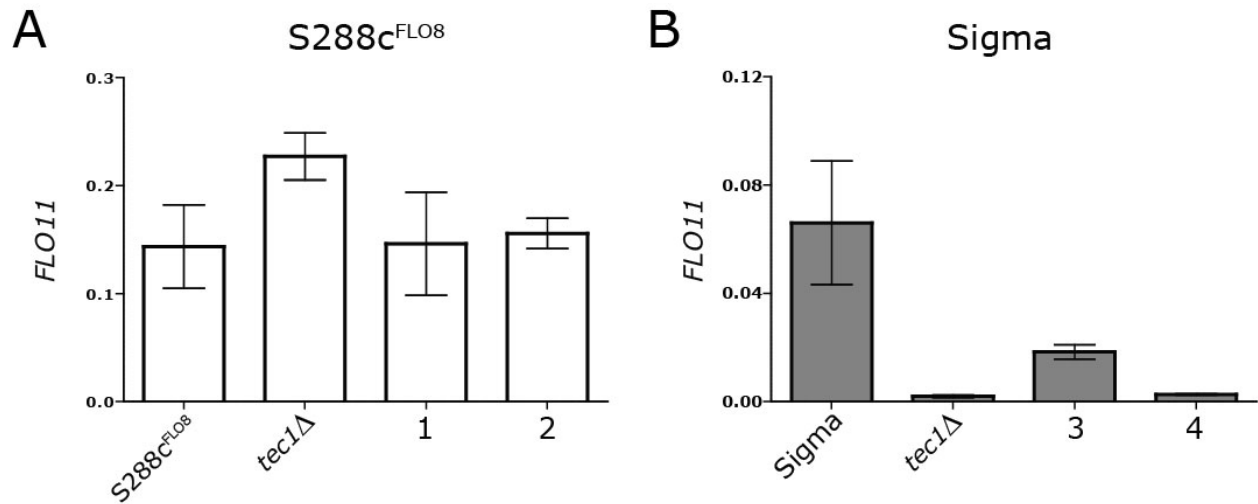

**Figure S1** S288c with *FLO11pr<sup>Sigma</sup>::FLO11* is still fMAPK independent. qPCR assay of *FLO11* transcript levels was performed on (A) S288c and (B) Sigma strains carrying *FLO11* promoter swaps. Mean *FLO11* levels normalized to *ACT1* levels are presented  $\pm$  SD. Strains with their endogenous *FLO11* promoter are labeled with their relevant genotype. Strains carrying a swapped *FLO11* promoter are labeled numerically: (1) S288c *FLO11pr<sup>Sigma</sup>::FLO11*; (2) S288c *FLO11pr<sup>Sigma</sup>::FLO11, tec1Δ*; (3) Sigma *FLO11pr<sup>S288c</sup>::FLO11*; (4) Sigma *FLO11pr<sup>S288c</sup>::FLO11, tec1Δ*.
